# Supplementary material for: Bladder Cancer Diagnosis and Identification of Clinically Significant Disease by Combined Urinary Detection of Mcm5 and Nuclear Matrix Protein 22
Source: PubMed Central journal article supplement (PMC3392249; doi:10.1371/journal.pone.0040305), 2012-07-09
Supplement: pone.0040305.s002.pdf [file pone.0040305.s002.pdf]

**Table S1: Patient diagnoses**

|                         |                                     | <b>n</b> |
|-------------------------|-------------------------------------|----------|
| Patients recruited      |                                     | 1677     |
| Diagnosis               | Malignancy of bladder/upper tract   | 222      |
|                         | Clear normal                        | 700      |
| Other malignancies      | Gynaecological                      | 2        |
|                         | Penile/testis                       | 2        |
|                         | Prostate cancer                     | 35       |
|                         | Renal cell carcinoma                | 17       |
| Urolithiasis            | Bladder calculus                    | 15       |
|                         | Renal calculus                      | 99       |
|                         | Vascular calcification in kidney    | 1        |
| Other benign conditions | Benign prostatic hyperplasia        | 143      |
|                         | Nephrological                       | 45       |
|                         | Prostatitis                         | 14       |
|                         | Urinary tract infection             | 273      |
| Miscellaneous benign    | Adult polycystic kidney disease     | 3        |
|                         | Angiomyolipoma                      | 5        |
|                         | Atrophic/poorly functioning kidney  | 6        |
|                         | Balanitis                           | 3        |
|                         | Bladder diverticulum                | 1        |
|                         | Catheter related                    | 3        |
|                         | Chronic retention of urine          | 6        |
|                         | Epididymo-orchitis                  | 8        |
|                         | Genitourinary tuberculosis          | 2        |
|                         | Haemorrhagic cystitis               | 4        |
|                         | Hydronephrosis                      | 1        |
|                         | Inverted papilloma                  | 1        |
|                         | Neurogenic/pathic bladder           | 3        |
|                         | Oncocytoma                          | 1        |
|                         | Normal <sup>a</sup>                 | 4        |
|                         | Phimosis/meatal stenosis            | 3        |
|                         | Pyelonephritis                      | 8        |
|                         | Pyelo-ureteric junction obstruction | 3        |
|                         | Pyogenic granuloma                  | 1        |
|                         | Radiation cystitis <sup>b</sup>     | 11       |
|                         | Renal transplant                    | 3        |
|                         | Traumatic catheterisation           | 1        |
|                         | Ureterocoele and retention of urine | 1        |
|                         | Urethral caruncle                   | 2        |
|                         | Urethral stricture                  | 24       |
|                         | Vascular malformation of kidney     | 1        |

<sup>a</sup> Patients had a history of bladder UCC (>5 years previously) or cyclophosphamide exposure

<sup>b</sup> Including one case with previous bladder UCC, four cases with previous prostate cancer
