# Supplementary material for: Bladder Cancer Diagnosis and Identification of Clinically Significant Disease by Combined Urinary Detection of Mcm5 and Nuclear Matrix Protein 22
Source: PubMed Central journal article supplement (PMC3392249; doi:10.1371/journal.pone.0040305), 2012-07-09
Supplement: pone.0040305.s003.pdf [file pone.0040305.s003.pdf]

**Table S2:** True positive rate of Mcm5 and NMP22 tests and cytology, across stage, for bladder carcinoma detection

| Test     | Cut-point | Stage Ta/T1 <sup>a</sup> |             | Stage T2/T3/T4 <sup>b</sup> |             |
|----------|-----------|--------------------------|-------------|-----------------------------|-------------|
|          |           | n                        | TPR, % (CI) | n                           | TPR, % (CI) |
| Mcm5     | 1000-cell | 163                      | 77 (69-83)  | 38                          | 92 (79-98)  |
|          | 2150-cell | 163                      | 64 (57-72)  | 38                          | 87 (72-96)  |
|          | 8500-cell | 163                      | 34 (27-42)  | 38                          | 74 (57-87)  |
| NMP22    | 10 U/ml   | 154                      | 47 (39-56)  | 34                          | 79 (62-91)  |
| Cytology |           | 155                      | 8 (5-14)    | 39                          | 10 (3-24)   |

Abbreviations: CI, 95% confidence interval; TPR, true positive rate

<sup>a</sup> Non-muscle invasive

<sup>b</sup> Muscle invasive
