# Supplementary material for: Bladder Cancer Diagnosis and Identification of Clinically Significant Disease by Combined Urinary Detection of Mcm5 and Nuclear Matrix Protein 22
Source: PubMed Central journal article supplement (PMC3392249; doi:10.1371/journal.pone.0040305), 2012-07-09
Supplement: pone.0040305.s004.pdf [file pone.0040305.s004.pdf]

**Table S3:** True positive rate of Mcm5 and NMP22 tests and cytology, across grade, for bladder carcinoma detection

| Test     | Cut-point | Grade 1 |             | Grade 2 |             | Grade 3/CIS |             |
|----------|-----------|---------|-------------|---------|-------------|-------------|-------------|
|          |           | n       | TPR, % (CI) | n       | TPR, % (CI) | n           | TPR, % (CI) |
| Mcm5     | 1000-cell | 23      | 61 (39-80)  | 123     | 77 (69-84)  | 63          | 92 (82-97)  |
|          | 2150-cell | 23      | 48 (27-69)  | 123     | 63 (54-72)  | 63          | 89 (78-95)  |
|          | 8500-cell | 23      | 13 (3-34)   | 123     | 33 (25-42)  | 63          | 71 (59-82)  |
| NMP22    | 10 U/ml   | 25      | 20 (7-41)   | 112     | 51 (41-60)  | 58          | 72 (59-83)  |
| Cytology |           | 23      | 4 (1-22)    | 117     | 7 (3-13)    | 62          | 15 (7-26)   |

Abbreviations: CI, 95% confidence interval; CIS, carcinoma in situ; TPR, true positive rate
