# Supplementary material for: Bladder Cancer Diagnosis and Identification of Clinically Significant Disease by Combined Urinary Detection of Mcm5 and Nuclear Matrix Protein 22
Source: PubMed Central journal article supplement (PMC3392249; doi:10.1371/journal.pone.0040305), 2012-07-09
Supplement: pone.0040305.s005.pdf [file pone.0040305.s005.pdf]

**Table S4:** Comparison of Mcm5 and NMP22 test performance in male and female patients

| <b>Test</b>        | <b>Male</b> |                  | <b>Female</b> |                  | <b>P<sup>a</sup></b> |
|--------------------|-------------|------------------|---------------|------------------|----------------------|
|                    | <b>n</b>    | <b>AUC (CI)</b>  | <b>n</b>      | <b>AUC (CI)</b>  |                      |
| Mcm5 <sup>b</sup>  | 983         | 0.76 (0.72-0.81) | 581           | 0.75 (0.68-0.82) | 0.76                 |
| NMP22 <sup>c</sup> | 874         | 0.69 (0.64-0.75) | 522           | 0.80 (0.72-0.88) | 0.025                |

Abbreviations: AUC, area under the curve; CI, 95% confidence interval

<sup>a</sup> Chi-squared test comparing AUC values for males vs females

<sup>b</sup> Based on 155 and 828 male patients and 55 and 526 female patients respectively with and without UCC

<sup>c</sup> Based on 144 and 730 male patients and 51 and 471 female patients respectively with and without UCC
