# Supplementary material for: Bladder Cancer Diagnosis and Identification of Clinically Significant Disease by Combined Urinary Detection of Mcm5 and Nuclear Matrix Protein 22
Source: PubMed Central journal article supplement (PMC3392249; doi:10.1371/journal.pone.0040305), 2012-07-09
Supplement: pone.0040305.s006.pdf [file pone.0040305.s006.pdf]

**Table S5:** True and false negative rates of the Mcm5 and NMP22 tests, by tumour grade and stage

| Cut-point    | n    | TNR, % (CI) |    | FNR, % (CI) |     | Grade 2    |    | Grade 3    |     | Stage pTa  |    | Stage pT1  |    | Stage ≥pT2 |  |
|--------------|------|-------------|----|-------------|-----|------------|----|------------|-----|------------|----|------------|----|------------|--|
|              |      | Normal      | n  | Grade 1     | n   | n          | n  | n          | n   | n          | n  | n          | n  | n          |  |
| <i>Mcm5</i>  |      |             |    |             |     |            |    |            |     |            |    |            |    |            |  |
| 1000-cell    | 1354 | 50 (47-53)  | 23 | 39 (20-61)  | 123 | 23 (16-31) | 55 | 7 (2-18)   | 115 | 31 (23-41) | 48 | 4 (1-14)   | 38 | 8 (2-21)   |  |
| 2150-cell    | 1354 | 69 (66-71)  | 23 | 52 (31-73)  | 123 | 37 (28-46) | 55 | 11 (4-22)  | 115 | 46 (38-56) | 48 | 10 (3-23)  | 38 | 13 (4-28)  |  |
| 8500-cell    | 1354 | 95 (94-96)  | 23 | 87 (66-97)  | 123 | 67 (58-75) | 55 | 27 (16-41) | 115 | 81 (72-88) | 48 | 29 (17-44) | 38 | 26 (13-43) |  |
| <i>NMP22</i> |      |             |    |             |     |            |    |            |     |            |    |            |    |            |  |
| 10 U/ml      | 1201 | 84 (82-86)  | 25 | 80 (59-93)  | 112 | 49 (40-59) | 51 | 25 (14-40) | 109 | 62 (53-71) | 45 | 29 (16-44) | 34 | 21 (9-38)  |  |

Abbreviations: CI, 95% confidence interval; FNR, false negative rate; TNR, true negative rate (specificity)
